# Supplementary material for: An insight into the invasion of breast ductal carcinoma in situ based on clinical, pathological and hematological data
Source: PeerJ. 2022 Aug 31;10:e13966. doi: 10.7717/peerj.13966 (PMC9440660; doi:10.7717/peerj.13966)
Supplement: Supplemental Information 1 [file peerj-10-13966-s001.xlsx]

## Sheet: Sheet1
Group	Age	Anatomic neoplasm subdivisions	Menstruation	Time	ER	PR	HER-2	Ki-67	DCIS Grade	Mixed	Metastasis of LN	PDW/PCT	SII	PLR	NLR	Lymphocyte	Neutrophil	Platelet	PCT	PDW	ER	PR	Note
Non-invasion	21	Left	Pre-menopause	2018-04-19	Negative	Negative	3+	35	High	No	No	75	405.34	111.97	2.55	1.42	3.62	159	0.2	15	0	0	/
Non-invasion	28	Left	Pre-menopause	2017-07-07	Positive	Positive	1+	5	High	No	No	75	301.71	77.56	1.9	2.05	3.89	159	0.2	15	60	0	/
Non-invasion	28	Right	Pre-menopause	2019-06-13	Negative	Negative	3+	30	Intermediate	No	No	55.2381	304.396	109.89	1.52198	1.82	2.77	200	0.21	11.6	0	0	/
Non-invasion	30	Left	Pre-menopause	2014-07-24	Positive	Negative	3+	40	High	No	No	48.3333	331.09	96.81	1.21	2.82	3.42	273	0.3	14.5	1	0	/
Non-invasion	30	Left	Pre-menopause	2018-08-21	Positive	Positive	3+	7	High	No	No	65.5	438.229	158.779	2.10687	1.31	2.76	208	0.2	13.1	80	80	/
Non-invasion	31	Left	Pre-menopause	2019-11-11	Negative	Negative	3+	30	High	No	No	53.2	528.37	170.99	2.36	1.31	3.09	224	0.25	13.3	0	0	/
Non-invasion	31	Left	Pre-menopause	2020-08-07	Positive	Positive	2+	20	High	No	No	39.0625	1086.64	235.714	3.65873	1.26	4.61	297	0.32	12.5	90	70	/
Non-invasion	33	Right	Pre-menopause	2018-01-15	Positive	Positive	0+	20	Intermediate	No	No	38.6667	338.49	111.71	1.36	2.22	3.03	248	0.3	11.6	90	90	/
Non-invasion	33	Right	Pre-menopause	2019-09-06	Negative	Negative	2+	20	High	No	No	39.2857	505.95	147.94	1.76	1.94	3.42	287	0.28	11	0	0	/
Non-invasion	34	Left	Pre-menopause	2019-04-22	Positive	Positive	1+	20	Intermediate	No	No	34.3333	279.045	163.184	0.850746	2.01	1.71	328	0.3	10.3	90	90	/
Non-invasion	36	Left	Pre-menopause	2017-02-22	Positive	Positive	2+	20	Intermediate	No	No	44.6667	859.11	157.06	3.22	1.7	5.47	267	0.3	13.4	80	60	/
Non-invasion	37	Left	Menopause	2015-04-23	Positive	Positive	3+	40	High	No	No	38	600.52	154.38	2.43	1.6	3.89	247	0.3	11.4	90	80	/
Non-invasion	37	Right	Pre-menopause	2018-08-27	Positive	Positive	2+	20	Intermediate	No	No	40	1784.85	295.51	6.79	0.89	6.04	263	0.3	12	90	60	/
Non-invasion	37	Right	Pre-menopause	2020-07-15	Positive	Positive	2+	30	High	No	No	32.8571	396.87	243.48	1.18	1.38	1.63	336	0.35	11.5	90	70	/
Non-invasion	37	Left	Pre-menopause	2018-06-04	Positive	Positive	1+	10	Low	No	No	29.25	1042.44	251.19	2.47024	1.68	4.15	422	0.4	11.7	90	90	/
Non-invasion	38	Right	Pre-menopause	2017-01-11	Positive	Positive	0+	5	High+Low	Yes	No	44.6667	487.91	150.59	1.91	1.7	3.24	256	0.3	13.4	70	20	/
Non-invasion	38	Right	Pre-menopause	2017-04-26	Negative	Positive	3+	20	High	No	No	71.5	985.04	162.28	5.32	1.14	6.07	185	0.2	14.3	0	0	/
Non-invasion	38	Left	Pre-menopause	2017-05-27	Positive	Positive	2+	20	High	No	No	44.3333	470.12	195.07	1.7	1.42	2.41	277	0.3	13.3	70	70	/
Non-invasion	38	Left	Pre-menopause	2018-03-07	Positive	Positive	2+	5	Intermediate	No	No	37.6667	268.83	153.61	1.05	1.66	1.75	255	0.3	11.3	50	25	/
Non-invasion	38	Right	Pre-menopause	2018-05-15	Positive	Positive	1+	30	High+Intermediate	Yes	No	37	507.1	239.2	1.7	1.25	2.12	299	0.3	11.1	90	80	/
Non-invasion	39	Left	Pre-menopause	2017-04-24	Negative	Negative	3+	20	High	No	No	/	/	/	/	/	/	/	/	/	0	0	/
Non-invasion	40	Right	Pre-menopause	2018-12-10	Negative	Negative	2+	10	Low	No	No	64	335.25	112.5	1.62	1.84	2.98	207	0.2	12.8	0	0	/
Non-invasion	40	Right	Pre-menopause	2019-07-22	Positive	Positive	1+	5	High	No	No	74.2105	282.649	113.514	1.68243	1.48	2.49	168	0.19	14.1	90	90	/
Non-invasion	40	Left	Pre-menopause	2019-08-05	Positive	Positive	2+	10	High	No	No	53.6	323.955	132.768	1.37853	1.77	2.44	235	0.25	13.4	80	80	/
Non-invasion	41	Right	Pre-menopause	2018-07-30	Positive	Positive	3+	15	Low	No	No	67	303.55	138.61	1.39	1.44	3.37	268	0.3	20.1	90	0	/
Non-invasion	42	Right	Pre-menopause	2015-02-07	Positive	Positive	1+	20	Low	No	No	40.3333	720.56	217.69	2.55	1.3	3.31	283	0.3	12.1	90	90	/
Non-invasion	42	Left	Pre-menopause	2017-10-21	Positive	Positive	2+	5	/	No	No	31	725.37	215.24	2.05	0.97	2.06	235	0.3	9.3	80	80	/
Non-invasion	42	Right	Pre-menopause	2018-10-17	Negative	Negative	3+	50	High	No	No	39.6667	765.33	159.777	2.67598	1.79	4.79	286	0.3	11.9	0	0	/
Non-invasion	42	Left	Pre-menopause	2019-01-21	Positive	Positive	0+	20	Intermediate	No	No	48	525.92	198.46	2.04	1.3	2.65	258	0.2	9.6	60	95	/
Non-invasion	42	Right	Pre-menopause	2019-07-31	Positive	Positive	2+	20	High	No	No	43.9286	633.89	155.75	2.34	1.74	4.07	271	0.28	12.3	90	60	/
Non-invasion	42	Left	Pre-menopause	2019-08-26	Positive	Positive	2+	70	High	No	No	50.8	442.345	118.274	1.89848	1.97	3.74	233	0.25	12.7	3	3	/
Non-invasion	43	Left	Pre-menopause	2017-09-02	Positive	Positive	2+	50	High	No	No	81.5	132.19	63.86	1.02	2.02	2.07	129	0.2	16.3	80	80	/
Non-invasion	44	Left	Pre-menopause	2018-01-15	Positive	Positive	1+	10	Low	No	No	35.6667	764.38	166.17	2.29	2.01	4.6	334	0.3	10.7	70	90	/
Non-invasion	45	Left	Pre-menopause	2016-02-24	Negative	Positive	3+	40	High	No	No	70	266.588	242.353	1.29412	0.85	1.1	206	0.2	14	0	2	/
Non-invasion	45	Right	Pre-menopause	2017-11-30	Positive	Positive	2+	30	High	No	No	79.5	296.64	76.65	1.7	2.27	3.87	174	0.2	15.9	90	20	/
Non-invasion	45	Left	Pre-menopause	2019-07-25	Positive	Positive	3+	10	High	No	No	91.0526	69.0265	44.2478	0.460177	3.39	1.56	150	0.19	17.3	0	0	/
Non-invasion	45	Right	Pre-menopause	2020-06-15	Positive	Positive	2+	60	High	No	No	44	521.69	169.93	2.15	1.43	3.07	243	0.25	11	50	50	/
Non-invasion	46	Right	Pre-menopause	2016-01-21	Positive	Positive	1+	10	Low	No	No	79.5	151.93	69.06	0.99	2.23	2.2	154	0.2	15.9	75	7	/
Non-invasion	46	Left	Pre-menopause	2017-10-28	Positive	Positive	0+	20	High	No	No	79.5	296.64	76.65	1.7	1.64	3.37	353	0.3	23.85	90	90	/
Non-invasion	46	Left	Pre-menopause	2018-07-20	Negative	Negative	2+	4	Low	No	No	37	627.19	186.11	2.34	1.58	2.55	302	0.3	11.1	0	0	/
Non-invasion	46	Right	Pre-menopause	2018-09-15	Negative	Negative	3+	60	High	No	No	36.3333	199.16	104.82	0.76	2.49	1.9	261	0.3	10.9	0	0	/
Non-invasion	47	Left	Pre-menopause	2016-01-11	Positive	Positive	2+	15	Low	No	No	59.5	223.778	78.5185	1.05556	2.7	2.85	212	0.2	11.9	90	75	/
Non-invasion	47	Left	Pre-menopause	2017-09-13	Negative	Negative	3+	30	High	No	No	32	317.41	126.46	0.98	2.57	2.51	325	0.3	9.6	0	0	/
Non-invasion	47	Right	Pre-menopause	2019-01-10	Negative	Negative	2+	70	High	No	No	55.5	723.689	178.689	3.31967	1.22	4.05	218	0.2	11.1	0	0	/
Non-invasion	47	Left	Pre-menopause	2019-01-28	Positive	Positive	0+	30	High	No	No	32.3333	195.11	111.49	0.74	2.35	1.75	262	0.3	9.7	90	90	/
Non-invasion	47	Left	Pre-menopause	2019-07-16	Positive	Positive	2+	30	High	No	No	48.8	345.85	130.51	1.5	1.77	2.65	231	0.25	12.2	90	50	/
Non-invasion	48	Left	Pre-menopause	2015-07-11	Positive	Positive	2+	2	/	No	No	37	438.95	98.64	1.51	2.94	4.45	290	0.3	11.1	75	75	/
Non-invasion	48	Right	Pre-menopause	2016-04-22	Negative	Negative	3+	25	High	No	No	89.5	298.46	79.17	1.75	2.16	3.77	171	0.2	17.9	0	0	/
Non-invasion	48	Right	Pre-menopause	2017-08-26	Positive	Positive	2+	8	High+Low	Yes	No	32.6667	569.45	176.85	1.59	2.03	3.22	359	0.3	9.8	80	90	/
Non-invasion	48	Left	Pre-menopause	2017-12-20	Positive	Positive	2+	10	Intermediate	No	No	43.6667	526.21	90.26	1.89	3.08	5.83	278	0.3	13.1	80	80	/
Non-invasion	48	Right	Pre-menopause	2018-07-16	Negative	Positive	3+	50	High	No	No	42.6667	706.941	131.892	2.8973	1.85	5.36	244	0.3	12.8	0	0	/
Non-invasion	48	Right	Pre-menopause	2018-09-15	Positive	Positive	3+	40	High	No	No	34.6667	679.66	199.32	2.34	1.46	3.41	291	0.3	10.4	0	2	/
Non-invasion	48	Right	Pre-menopause	2019-06-24	Positive	Positive	2+	5	Intermediate	No	No	37.1875	750.9	204.61	2.41	1.52	3.67	311	0.32	11.9	80	80	/
Non-invasion	48	Right	Pre-menopause	2019-09-23	Positive	Positive	2+	10	High	No	No	44.7619	328.89	124.58	1.47	1.79	2.64	223	0.21	9.4	70	80	/
Non-invasion	48	Left	Pre-menopause	13177624	Positive	Positive	/	15	Low	No	No	41	421.85	125.551	1.48018	2.27	3.36	285	0.3	12.3	90	90	/
Non-invasion	49	Left	Pre-menopause	2016-01-15	Positive	Positive	2+	10	Intermediate	No	No	63.5	289.2	120	1.50625	1.6	2.41	192	0.2	12.7	80	70	/
Non-invasion	49	Left	Pre-menopause	2018-04-21	Positive	Positive	1+	15	Intermediate	No	No	48.5	335.76	110.81	1.64	1.85	3.03	205	0.2	9.7	90	90	/
Non-invasion	49	Left	Pre-menopause	2018-07-02	Positive	Positive	2+	20	Low	No	No	40	560.62	168.86	1.99	1.67	3.32	282	0.3	12	90	90	/
Non-invasion	49	Left	Pre-menopause	2018-09-19	Positive	Positive	2+	30	Low	No	No	43	481.29	124.37	1.96	1.97	3.87	245	0.3	12.9	70	90	/
Non-invasion	49	Left	Pre-menopause	2019-05-13	Positive	Positive	1+	5	High	No	No	65.9091	274.84	72.9	1.44	2.62	3.77	191	0.22	14.5	90	80	/
Non-invasion	49	Right	Pre-menopause	2019-07-04	Positive	Positive	3+	30	High	No	No	37.1429	799.86	171.28	2.48	1.88	4.67	322	0.35	13	1	1	/
Non-invasion	49	Left	Pre-menopause	2018-09-12	Negative	Negative	3+	2	Intermediate	No	No	34.6667	546.109	76.4858	1.84496	3.87	7.14	296	0.3	10.4	0	0	/
Non-invasion	50	Right	Pre-menopause	2014-11-05	Positive	Positive	3+	30	High	No	No	42	905.81	169.95	2.91	1.83	5.33	311	0.3	12.6	75	75	/
Non-invasion	50	Right	Menopause	2015-08-22	Positive	Positive	0+	15	/	No	No	43.6667	738.13	178.72	2.93	1.41	4.13	252	0.3	13.1	75	75	/
Non-invasion	50	Right	Pre-menopause	2017-04-19	Negative900/Negative/Positive	Negative900/Negative/Positive	1+90+0+/1+/1+	5	Intermediate	No	No	47.3333	511.92	189.6	2.16	1.25	2.7	237	0.3	14.2	90	90	/
Non-invasion	50	Right	Pre-menopause	2017-12-15	Negative	Negative	3+	20	/	No	No	80	297.59	94.47	1.58	1.99	3.15	188	0.2	16	0	0	/
Non-invasion	50	Right	Pre-menopause	2018-01-19	Positive	Negative	2+	2	Intermediate	No	No	29	793.28	219.75	2.3	1.57	3.61	345	0.4	11.6	1	1	/
Non-invasion	50	Right	Pre-menopause	2019-06-24	Positive	Positive	2+	30	High	No	No	51	341.11	129.21	1.31	2.02	2.64	261	0.3	15.3	90	80	/
Non-invasion	50	Left	Pre-menopause	2019-07-22	Negative	Positive	3+	40	High	No	No	55	381.38	85.9	1.9	2.34	4.44	201	0.2	11	0	1	/
Non-invasion	50	Left	Menopause	2019-09-02	Positive	Positive	3+	20	High	No	No	103.333	187.91	82.78	1.5	1.51	2.27	125	0.15	15.5	20	5	/
Non-invasion	50	Right	Pre-menopause	2019-10-14	Negative	Negative	3+	15	High	No	No	51.1538	1156.97	217.48	5.17	1.03	5.32	224	0.26	13.3	0	0	/
Non-invasion	50	Right	Pre-menopause	2020-04-28	Negative	Negative	2+	15	High	No	No	58.5	540.32	169.91	2.81	1.13	3.18	192	0.2	11.7	0	0	/
Non-invasion	50	Left	Menopause	2020-06-23	Positive	Positive	2+	1	/	No	No	50	324.65	238.71	1.46	0.93	1.36	222	0.25	12.5	90	90	/
Non-invasion	50	Right	Pre-menopause	2018-11-08	Positive	Positive	1+	1	Low	No	No	53.5	233.025	99.1597	0.987395	2.38	2.35	236	0.2	10.7	90	50	/
Non-invasion	51	Left	Menopause	2016-11-22	Positive	Positive	3+	20	High	No	No	43	413.7	119.57	1.88	1.84	3.46	220	0.2	8.6	50	20	/
Non-invasion	51	Left	Pre-menopause	2018-07-02	Negative	Negative	3+	30	High	No	No	59.5	448.9	161.48	2.28	1.22	2.78	197	0.2	11.9	0	0	/
Non-invasion	51	Right	Pre-menopause	2018-08-06	Positive	Positive	1+	3	High	No	No	43.3333	268.53	66.3	1.1	1.58	2.19	219	0.2	8.7	95	60	/
Non-invasion	52	Left	Pre-menopause	2017-02-23	Negative	Negative	3+	25	/	No	No	59.5	463.3	133.13	2.1	1.66	3.48	221	0.2	11.9	0	0	/
Non-invasion	52	Left	Pre-menopause	2018-04-27	Negative	Negative	3+	50	High	No	No	52.5	345.72	118.4	1.38	2.12	2.92	251	0.2	10.5	0	0	/
Non-invasion	52	Right	Menopause	2018-06-24	Negative	Negative	2+	15	High	No	No	38.3333	423.2	105.54	1.48	2.71	4.01	286	0.3	11.5	0	0	/
Non-invasion	52	Right	Pre-menopause	2020-06-11	Negative	Negative	3+	30	High	No	No	59.0476	279.57	99.49	1.43	1.96	2.81	195	0.21	12.4	0	0	/
Non-invasion	53	Left	Pre-menopause	2017-03-22	Positive	Positive	0+	5	High	No	No	44.3333	379.12	113.17	1.63	2.05	3.35	232	0.3	13.3	80	80	/
Non-invasion	53	Left	Menopause	2017-08-30	Negative	Positive	3+	25	High	No	No	57.5	292.35	79.01	1.52	2.43	3.7	192	0.2	11.5	0	8	/
Non-invasion	53	Left	Menopause	2017-12-23	Negative	Negative	3+	40	High	No	No	40.3333	452.57	159.35	1.83	1.55	2.84	247	0.3	12.1	0	0	/
Non-invasion	53	Right	Pre-menopause	2019-07-19	Positive	Positive	3+	10	High	No	No	38.6207	355.91	158.89	1.24	1.8	2.24	286	0.29	11.2	90	20	/
Non-invasion	53	Left	Pre-menopause	2019-08-13	Positive	Positive	3+	5	High	No	No	53.3333	316.02	106.76	1.43	2.07	2.96	221	0.24	12.8	5	5	/
Non-invasion	54	Left	Pre-menopause	2012-11-05	Positive	Positive	3+	30	High	No	No	36.3333	204.64	106.58	0.79	2.43	1.92	259	0.3	10.9	80	10	/
Non-invasion	54	Left	Pre-menopause	2015-07-09	Positive	Positive	2+	50	High	No	No	29.6667	678.707	114.068	2.26236	2.63	5.95	300	0.3	8.9	75	15	/
Non-invasion	54	Right	Pre-menopause	2015-09-09	Positive	Positive	1+	30	/	No	No	76	291.91	78.26	2.03	1.84	3.73	144	0.2	15.2	90	75	/
Non-invasion	54	Left	Menopause	2016-02-23	Positive	Positive	3+	25	High	No	No	62	338.436	104.455	1.60396	2.02	3.24	211	0.2	12.4	0	0	/
Non-invasion	54	Right	Menopause	2017-05-31	Negative	Positive	3+	30	High	No	No	38.6667	515.27	133.49	1.82	2.12	3.86	283	0.3	11.6	0	10	/
Non-invasion	54	Right	Pre-menopause	2018-02-02	Positive	Negative	3+	2	High	No	No	62.5	336.61	109.29	1.68	1.83	3.08	200	0.2	12.5	0	0	/
Non-invasion	54	Right	Pre-menopause	2020-02-17	Negative	Positive	2+	40	High	No	No	46.1538	352.89	201.65	1.45	1.21	1.75	244	0.26	12	0	1	/
Non-invasion	54	Left	Menopause	2020-08-17	Positive	Positive	2+	40	High	No	No	46.1538	441.13	129.74	1.74	1.95	3.4	253	0.26	12	3	2	/
Non-invasion	55	Right	Pre-menopause	2016-05-25	Negative	Negative	3+	20	High	No	No	62	323.94	134.42	1.56	1.54	2.41	207	0.2	12.4	0	0	/
Non-invasion	55	Left	Menopause	2018-12-10	Positive	Positive	3+	25	High	No	No	/	284.29	110.19	1.64	1.57	2.58	173	/	/	90	20	/
Non-invasion	55	Left	Menopause	2019-08-15	Negative	Negative	3+	70	High	No	No	52	415.86	156.34	1.87	1.42	2.66	222	0.25	13	0	0	/
Non-invasion	55	Left	Pre-menopause	2013-06-20	Positive	Positive	1+	10	Intermediate	No	No	42	319.514	138.919	1.24324	1.85	2.3	257	0.3	12.6	75	75	/
Non-invasion	56	Left	Menopause	2017-08-29	Positive	Positive	0+	20	Low	No	No	67	505.26	113.54	2.32	1.92	4.45	218	0.2	13.4	90	40	/
Non-invasion	56	Left	Menopause	2018-09-25	Positive	Positive	3+	10	High	No	No	63	242.55	101.06	1.28	1.88	2.4	190	0.2	12.6	0	0	/
Non-invasion	56	Right	Menopause	2018-12-14	Positive	Positive	1+	10	/	No	No	51.5	698.02	120.77	3.16	1.83	5.78	221	0.2	10.3	90	90	/
Non-invasion	57	Left	Menopause	2016-10-12	Positive	Negative	3+	30	High	No	No	36.3333	472.198	120.152	1.4943	2.63	3.93	316	0.3	10.9	80	0	/
Non-invasion	57	Right	Menopause	2018-01-11	Negative	Positive	3+	30	High	No	No	53	183.802	90.991	0.90991	2.22	2.02	202	0.2	10.6	0	0	/
Non-invasion	57	Right	Pre-menopause	2018-11-12	Positive	Positive	1+	5	Low	No	No	64	235.06	67.94	1.1	3.15	3.46	214	0.2	12.8	5	1	/
Non-invasion	58	Left	Menopause	2016-03-10	Positive	Positive	0+	4	Low	No	No	33	537.04	129.72	1.66	2.49	4.14	323	0.4	13.2	95	95	/
Non-invasion	58	Right	Menopause	2016-05-10	Positive	Positive	3+	5	High	No	No	63.5	273.485	103.593	1.58084	1.67	2.64	173	0.2	12.7	1	1	/
Non-invasion	58	Left	Menopause	2017-03-21	Negative	Negative	3+	20	High	No	No	30.5	805.48	138.64	2.2	2.64	5.81	366	0.4	12.2	0	0	/
Non-invasion	59	Left	Menopause	2017-08-30	Positive	Negative	3+	20	High	No	No	37.3333	358.52	110.31	1.46	2.23	3.25	246	0.3	11.2	20	0	/
Non-invasion	59	Right	Menopause	2018-01-12	Positive	Positive	3+	20	High	No	No	46.3333	287.69	83.39	1.12	3.07	3.45	256	0.3	13.9	50	5	/
Non-invasion	59	Right	Menopause	2018-12-10	Positive	Positive	3+	10	High	No	No	54.5	219.851	108.837	0.939535	2.15	2.02	234	0.2	10.9	0	1	/
Non-invasion	59	Left	Menopause	2019-08-13	Negative	Negative	2+	25	High	No	No	39.6296	341.02	264.36	1.28	1.01	1.29	267	0.27	10.7	0	0	/
Non-invasion	59	Left	Menopause	2020-08-24	Positive	Positive	1+	15	Low	No	No	57.619	505.68	165.25	2.59	1.18	3.06	195	0.21	12.1	100	95	/
Non-invasion	60	Right	Menopause	2016-03-11	Negative	Positive	3+	40	High	No	No	34	427.05	186.49	1.55	1.48	2.29	276	0.3	10.2	0	0	/
Non-invasion	60	Right	Menopause	2018-08-23	Negative	Positive	3+	50	High	No	No	40	1784.85	295.51	6.79	3.68	4.05	244	0.3	12	0	10	/
Non-invasion	61	Right	Menopause	2016-01-30	Positive	Positive	0+	15	Low	No	No	41	210.93	90.53	0.82	2.85	2.33	258	0.3	12.3	75	95	/
Non-invasion	62	Left	Menopause	2016-11-04	Positive	Positive	2+	20	/	No	No	35.3333	507.46	118.57	1.81	2.37	4.28	281	0.3	10.6	90	40	/
Non-invasion	62	Right	Menopause	2017-01-05	Negative	Negative	3+	5	Intermediate	No	No	47	321.99	72.03	1.26	3.54	4.47	255	0.3	14.1	0	0	/
Non-invasion	62	Left	Menopause	2019-01-24	Negative	Positive	3+	20	High	No	No	61.5	150.58	86.05	0.81	2.15	1.75	185	0.2	12.3	0	0	/
Non-invasion	62	Left	Menopause	2019-07-08	Positive	Positive	1+	8	Intermediate	No	No	51.3636	383.657	102.857	1.77619	2.1	3.73	216	0.22	11.3	90	70	/
Non-invasion	64	Left	Menopause	2016-04-08	Negative	Positive	3+	20	High	No	No	41	522.9	157.5	2.08	1.6	3.32	252	0.3	12.3	0	3	/
Non-invasion	64	Left	Menopause	2018-01-12	Positive	Positive	3+	10	High	No	No	72.5	329.149	148.936	1.56738	1.41	2.21	210	0.2	14.5	80	30	/
Non-invasion	65	Right	Pre-menopause	2015-11-16	Positive	Positive	3+	40	High	No	No	82.5	396.23	127.81	2.05	1.51	3.1	193	0.2	16.5	5	2	/
Non-invasion	65	Left	Menopause	2016-05-12	Positive	Positive	3+	15	High	No	No	64.5	522.512	117.683	2.70732	1.64	4.44	193	0.2	12.9	40	1	/
Non-invasion	65	Right	Menopause	2020-06-16	Positive	Positive	2+	10	Intermediate	No	No	50.8333	400.92	112.62	1.66	2.14	3.56	241	0.24	12.2	90	90	/
Non-invasion	65	Left	Pre-menopause	2020-07-14	Positive	Positive	1+	5	Low	No	No	51	413.77	101.91	1.94	2.09	4.06	213	0.2	10.2	90	90	/
Non-invasion	66	Right	Menopause	2015-08-12	Positive	Negative	2+	10	/	No	No	68	315.46	93.89	1.47	2.29	3.36	215	0.2	13.6	1	0	/
Non-invasion	66	Right	Menopause	2017-02-21	Positive	Positive	2+	15	Low	No	No	57.5	336.52	103.23	1.75	1.86	3.26	192	0.2	11.5	90	90	/
Non-invasion	66	Right	Menopause	2017-12-25	Positive	Positive	2+	25	/	No	No	38	293.11	97.38	1.13	2.67	3.01	260	0.3	11.4	70	90	/
Non-invasion	66	Right	Menopause	2018-05-18	Positive	Positive	1+	20	Intermediate	No	No	52	154.8	97.98	0.64	2.47	1.58	242	0.2	10.4	90	90	/
Non-invasion	66	Left	Menopause	2019-08-27	Positive	Positive	1+	10	Low	No	No	60.5	193	85.022	1	2.27	2.27	193	0.2	12.1	90	90	/
Non-invasion	67	Left	Pre-menopause	2012-06-15	Negative	Negative	3+	20	/	No	No	42	375.67	116.67	1.41	2.28	3.22	266	0.3	12.6	0	0	/
Non-invasion	67	Right	Menopause	2019-07-30	Positive	Positive	2+	15	Low	No	No	35.625	484.55	118.18	1.55	2.64	4.1	312	0.32	11.4	90	90	/
Non-invasion	68	Right	Menopause	2016-08-25	Positive	Positive	0+	5	/	No	No	45	411.24	93.68	1.74	2.53	4.39	237	0.3	13.5	30	20	/
Non-invasion	68	Right	Menopause	2018-05-11	Positive	Positive	0+	15	Low	No	No	71	243.91	97.18	1.42	1.77	2.51	172	0.2	14.2	50	50	/
Non-invasion	68	Right	Menopause	2019-07-29	Positive	Positive	3+	25	High	No	No	45.8621	441.85	118.14	1.65	2.26	3.74	267	0.29	13.3	0	2	/
Non-invasion	68	Left	Menopause	2020-08-04	Negative	Negative	3+	20	High	No	No	57.2727	326.05	92.11	1.55	2.28	3.54	210	0.22	12.6	0	0	/
Non-invasion	71	Left	Menopause	2015-11-30	Positive	Positive	2+	20	Low	No	No	69.5	226.77	75.09	1.09	2.77	3.02	208	0.2	13.9	90	90	/
Non-invasion	71	Right	Menopause	2018-11-12	Positive	Negative	2+	40	High	No	No	58	575.882	215.686	2.61765	1.02	2.67	220	0.2	11.6	5	0	/
Non-invasion	72	Right	Menopause	2014-06-19	Positive	Positive	0+	25	/	No	No	32.6667	405.72	149.16	1.52	1.79	2.72	267	0.3	9.8	75	50	/
Non-invasion	72	Right	Menopause	2018-07-09	Positive	Positive	0+	5	Low	No	No	42.5	169.92	73.88	0.94	2.45	2.3	181	0.2	8.5	95	95	/
Non-invasion	73	Right	Menopause	2019-12-23	Negative	Positive	3+	10	High+Intermediate	Yes	No	49	326.22	130.49	1.52	1.64	2.5	214	0.2	9.8	0	5	/
Non-invasion	75	Left	Menopause	2017-08-30	Positive	Positive	3+	15	High	No	No	66	318.63	128.48	1.57	1.58	2.48	203	0.2	13.2	90	90	/
Non-invasion	75	Left	Menopause	2019-04-22	Positive	Positive	2+	1	Intermediate	No	No	73.5	305.62	88.58	1.58	2.19	3.45	194	0.2	14.7	95	95	/
Non-invasion	78	Left	Menopause	2016-03-05	Positive	Positive	1+	10	Low	No	No	33.3333	633.32	122.03	2.29	2.27	5.19	277	0.3	10	90	40	/
Non-invasion	79	Left	Menopause	2017-02-07	Negative	Negative	1+	5	High	No	No	59	570.48	156.3	2.7	1.35	3.65	211	0.2	11.8	0	0	/
Non-invasion	83	Left	Menopause	2019-08-13	Positive	Positive	2+	10	Low	No	No	45	894.34	141.51	3.97	1.59	6.32	225	0.22	9.9	90	50	/
Non-invasion	90	Right	Menopause	2012-06-29	Negative	Negative	1+	30	/	No	No	124	257.55	63.59	1.97	2.06	4.05	131	0.1	12.4	0	0	/
Invasion	29	Left	Pre-menopause	2019-07-10	Positive	Negative	3+	20	High	No	No	39.3939	1012.65	282.08	3.39	1.06	3.59	299	0.33	13	3	0	/
Invasion	29	Left	Pre-menopause	2020-05-19	Negative	Positive	3+	20	High	No	No	34.5	232.81	287.42	0.51	1.59	0.81	457	0.4	13.8	0	1	/
Invasion	29	Right	Pre-menopause	2014-07-11	Negative	Negative	3+	20	High	No	No	50.3333	449.23	93.59	2.05	1.65	3.13	208	0.2	11	0	0	/
Invasion	29	Right	Pre-menopause	2020-05-19	Positive	Positive	3+	30	High	No	No	42.963	1556.12	198.485	5.93939	1.32	7.84	262	0.27	11.6	80	10	/
Invasion	31	Left	Pre-menopause	2015-12-10	Positive	Positive	2+	15	High	No	No	37.6667	439.16	98.69	1.46	3.05	4.45	301	0.3	11.3	60	20	/
Invasion	32	Right	Pre-menopause	2019-06-03	Positive	Positive	2+	10	Intermediate	No	No	45.1852	458.67	94.18	1.77	2.75	4.87	259	0.27	12.2	80	90	/
Invasion	33	Right	Pre-menopause	2017-08-21	Positive	Positive	1+	10	Intermediate	No	Yes	66.5	345.843	96.3351	1.87958	1.91	3.59	184	0.2	13.3	80	60	neoadjuvent therapy
Invasion	33	Left	Pre-menopause	2019-04-25	Positive	Positive	3+	50	High	No	/	28.25	526.928	142.029	1.3442	2.76	3.71	392	0.4	11.3	90	90	/
Invasion	34	Left	Pre-menopause	2016-11-23	Positive	Positive	2+	40	Intermediate	No	No	26.75	522.066	114.74	1.31503	3.46	4.55	397	0.4	10.7	70	70	/
Invasion	35	Left	Pre-menopause	2019-06-25	Negative	Negative	3+	10	High	No	No	58.6957	420.619	105.155	2.06186	2.82	2.91	205	0.2	12.9	0	0	/
Invasion	35	Left	Pre-menopause	2020-05-14	Negative	Positive	3+	60	High	No	Yes	/	1075.85	181.731	2.84615	2.88	6.32	228	0.2	10.7	0	3	neoadjuvent therapy
Invasion	37	Right	Menopause	2020-07-10	Positive	Positive	2+	10	High	No	No	75.5	227.52	116.08	1.37	1.43	1.96	166	0.2	15.1	70	40	/
Invasion	37	Left	Pre-menopause	2016-09-26	Positive	Positive	2+	50	High	No	Yes	28	527.135	158.776	1.3551	2.22	5.49	309	0.3	9.3	90	60	/
Invasion	37	Left	Pre-menopause	2018-04-24	Positive	Positive	3+	60	/	No	Yes	63.5	302.549	79.8283	1.62661	2.33	3.79	186	0.2	12.7	80	30	/
Invasion	37	Left	Menopause	2018-05-10	Positive	Positive	2+	20	/	No	Yes	39	710.669	158.278	2.97351	1.45	2.86	326	0.3	10.9	80	80	neoadjuvent therapy
Invasion	37	Right	Pre-menopause	2019-06-25	Negative	Negative	3+	20	High	No	Yes	61.3043	509.679	119.643	2.53571	1.68	4.26	201	0.23	14.1	0	0	/
Invasion	37	Left	Pre-menopause	2016-12-10	Negative	Negative	3+	30	High	No	Yes	44.3333	510.24	177.17	2.27	1.27	2.88	225	0.3	13.3	0	0	/
Invasion	38	Right	Pre-menopause	2018-09-12	Positive	Positive	0+	/	Low	No	Yes	39	571.486	139.048	1.95714	2.1	4.11	292	0.3	11.7	100	100	/
Invasion	39	Left	Pre-menopause	2017-08-17	Positive	Positive	3+	20	/	No	Yes	59	610.81	106.6	2.91	1.97	5.73	210	0.2	11.8	90	80	/
Invasion	39	Right	Pre-menopause	2017-10-24	Positive	Positive	3+	20		No	Yes	58.5	478.8	280	2.44	0.7	1.71	196	0.2	11.7	10	10	/
Invasion	39	Right	Pre-menopause	2017-11-26	Positive	Positive	1+	15	Intermediate	No	No	51	326.15	167.26	1.73	1.13	1.95	189	0.2	10.2	80	80	/
Invasion	39	Left	Pre-menopause	2016-12-21	Negative	Negative	2+	30	High	No	Yes	61.5	208.578	84.4444	1.09778	2.25	2.47	190	0.2	12.3	0	0	/
Invasion	39	Right	Pre-menopause	2017-09-05	Positive	Positive	2+	30	High	No	Yes	64.5	422.154	150.769	2.15385	1.3	2.8	12.9	0.2	12.9	20	20	/
Invasion	39	Left	Pre-menopause	2017-12-26	Positive	Positive	3+	30	/	No	Yes	39	432.203	144.068	1.69492	1.77	3	11.7	0.3	11.7	90	70	/
Invasion	39	Right	Pre-menopause	2018-03-29	Positive	Positive	3+	30	/	No	No	40.3333	637.555	219.091	2.64545	1.1	2.91	241	0.3	12.1	50	20	/
Invasion	39	Right	Pre-menopause	2018-05-02	Positive	Positive	2+	15	/	No	No	35.3333	745.674	194.186	2.23256	1.72	3.84	334	0.3	10.6	90	90	/
Invasion	40	Right	Pre-menopause	2018-11-08	Positive	Negative900/Negative/Positive	0+	30	High+Low	Yes	No	35.3333	151.97	121.58	0.52	3.43	4	272	0.3	10.3	90	50	/
Invasion	40	Left	Pre-menopause	2016-03-28	Positive	Positive	2+	15	High	No	Yes	72	324.218	133.974	1.55128	1.56	2.42	209	0.2	14.4	75	75	/
Invasion	40	Left	Pre-menopause	2020-08-28	Positive	Positive	2+	10	Intermediate+Low	Yes	Yes	2.40122	380.585	115.679	1.14634	2.87	3.29	332	0.27	7.9	95	95	/
Invasion	40	Right	Pre-menopause	2018-04-21	Positive	Positive	2+	10	/	No	No	29	895.77	129.26	2.23	3.11	6.93	402	0.4	11.6	1	5	/
Invasion	41	Left	Pre-menopause	2018-03-01	Negative	Negative	3+	85	High	No	No	43	398.82	73.18	1.59	3.43	5.45	251	0.3	12.9	0	0	/
Invasion	41	Left	Pre-menopause	2018-11-21	Positive	Positive	2+	5	High	No	No	30.5	243.95	173.02	0.75	1.89	1.41	327	0.4	12.2	70	70	/
Invasion	41	Left	Pre-menopause	2019-04-28	Positive	Positive	0+	8	/	No	No	40	589.264	229.286	1.83571	1.91	2.21	259	0.3	12.5	90	90	/
Invasion	41	Right	Pre-menopause	2019-05-10	Positive	Positive	0+	40	/	No	/	66.5	248.807	77.51	1.28916	2.49	3.21	193	0.2	13.3	95	95	/
Invasion	41	Left	Pre-menopause	2019-10-11	Positive	Positive	2+	5	Low	No	No	55	402.429	128.571	1.8631	1.68	3.13	216	0.24	13.2	100	100	/
Invasion	41	Right	Pre-menopause	2018-04-26	Positive	Positive	2+	5	High	No	No	39.6667	439.27	126.96	1.5	2.3	3.46	292	0.3	11.9	100	80	/
Invasion	41	Left	Pre-menopause	2020-06-29	Positive	Positive	3+	50	High	No	No	38.6667	440.4	120	1.49796	2.45	3.67	294	0.3	11.6	20	5	/
Invasion	42	Right	Menopause	2019-05-06	Positive	Positive	2+	50	/	No	/	41	581.651	146.512	2.30814	2.3	4.32	403	0.4	10.4	90	50	/
Invasion	42	Left	Pre-menopause	2019-10-16	Positive	Positive	0+	10	High	No	No	49.2	416.774	129.032	1.73656	1.86	3.23	240	0.25	12.3	95	95	/
Invasion	42	Left	Pre-menopause	2020-07-16	Positive	Positive	1+	30	High+Intermediate	Yes	Yes	36.2069	625	125	2.11864	2.36	5	295	0.29	10.5	90	90	/
Invasion	43	Left	Pre-menopause	2018-06-25	Negative	Negative	3+	10	High	No	No	61.5	601.77	158.78	2.89	1.31	3.79	208	0.2	12.3	0	0	/
Invasion	43	Right	Pre-menopause	2018-05-21	Positive	Positive	3+	10	Intermediate	No	Yes	36.25	901.197	136.752	2.81624	2.34	6.59	320	0.4	14.5	90	80	neoadjuvent therapy
Invasion	43	Right	Pre-menopause	2019-05-06	Positive	Positive	2+	40	/	No	No	34.5946	1023	150	3.0177	2.26	6.82	339	0.37	12.8	90	90	/
Invasion	43	Right	Pre-menopause	2019-07-17	Negative	Negative	3+	5	High	No	No	41.3158	1202.16	267.742	3.62097	1.24	4.49	332	0.38	15.7	0	0	/
Invasion	43	Left	Pre-menopause	2020-04-22	Positive	Positive	2+	20	Intermediate	No	No	45.8333	534.78	196.61	2.30508	1.18	2.72	232	0.24	11	90	90	/
Invasion	44	Left	Pre-menopause	2019-11-29	Positive	Positive	2+	10	High	No	No	45.8333	297.74	107.49	1.22	2.27	2.77	244	0.24	11	50	90	/
Invasion	44	Left	Pre-menopause	2019-05-29	Positive	Positive	2+	10	/	No	No	46.129	735.439	153.216	2.80702	2.07	2.71	264	0.24	9.4	90	75	/
Invasion	44	Right	Pre-menopause	2017-08-25	Positive	Positive	2+	20	Intermediate	No	No	44.3333	646.67	169.29	2.73	1.66	3.5	183	0.22	15.8	90	90	/
Invasion	44	Left	Pre-menopause	2018-09-28	Negative	Positive	3+	20	High	No	No	39.6667	1095.93	221.85	4.15	1.19	4.94	264	0.3	11.9	0	20	/
Invasion	45	Left	Pre-menopause	2017-05-04	Positive	Positive	2+	70	/	No	No	49.5	429.46	254.12	1.99	0.85	1.69	216	0.2	9.9	95	95	/
Invasion	45	Left	Menopause	2020-08-12	Positive	Positive	0+	10	High+Intermediate	Yes	No	25.1351	713.61	197.13	1.73	2.09	3.62	412	0.37	9.3	95	95	/
Invasion	45	Left	Pre-menopause	2015-11-23	Positive	Positive	3+	40	/	No	No	31.3333	496.74	124.809	1.51908	2.62	3.98	327	0.3	9.4	90	80	/
Invasion	46	Left	Pre-menopause	2014-12-30	Positive	Positive	2+	15	/	No	No	/	/	/	/	/	/	/	/		40	10	/
Invasion	46	Left	Pre-menopause	2018-05-18	Positive	Positive	3+	30	Low	No	No	68	420.52	169.57	2.16	1.15	2.48	195	0.2	13.6	90	90	/
Invasion	46	Right	Menopause	2020-07-20	Positive	Positive	2+	20	Intermediate	No	No	39.1176	282.59	182.32	0.95	1.64	1.55	299	0.34	13.3	80	95	/
Invasion	46	Left	Pre-menopause	2016-11-16	Positive	Positive	2+	30	/	No	Yes	32.6667	681.15	154.106	2.13527	2.07	4.42	319	0.3	9.8	90	90	/
Invasion	46	Right	Pre-menopause	2016-12-23	Positive	Positive	1+	15	/	No	No	89	170.957	89.5062	1.17901	1.62	1.91	145	0.2	17.8	90	90	/
Invasion	46	Left	Pre-menopause	2017-09-14	Positive	Positive	1+	20	Intermediate	No	Yes	88.5	522.353	136.029	2.82353	1.36	3.84	185	0.2	17.7	90	70	/
Invasion	46	Left	Pre-menopause	2019-04-24	Positive	Positive	0+	20	/	No	No	/	/	/	/	/	/	/	/	/	90	80	/
Invasion	46	Left	Pre-menopause	2019-07-10	Positive	Positive	2+	5	Low	No	Yes	77.8261	374.706	104.375	2.24375	1.6	3.59	167	0.23	17.9	90	90	/
Invasion	47	Right	Pre-menopause	2016-01-21	Positive	Positive	0+	5	/	No	No	37	380.03	146.73	1.21	2.14	2.59	314	0.3	11.1	95	90	/
Invasion	47	Right	Pre-menopause	2018-07-20	Positive	Positive	0+	30	High	No	No	35.3333	439.34	153.61	1.72	1.66	2.86	255	0.3	10.6	90	90	/
Invasion	47	Left A，Right B	Pre-menopause	2019-04-02	Positive	Positive	2+	20	High+Low	Yes	No	40	389.7	111.98	1.44	2.42	3.48	271	0.3	12	90	90	/
Invasion	47	Right	Menopause	2020-06-22	Positive	Positive	2+	10	Intermediate	No	No	48.6667	657.75	161.21	2.47	1.65	4.08	266	0.3	14.6	90	90	/
Invasion	47	Left	Pre-menopause	2018-07-03	Positive	Positive	3+	30	High	No	Yes	37.3333	495.892	187.838	1.78378	1.48	2.64	278	0.3	11.2	5	20	/
Invasion	47	Left	Pre-menopause	2018-07-24	Positive	Positive	1+	50	Intermediate	No	No	34	1091.39	274.219	3.10938	1.28	3.98	351	0.3	10.2	10	80	/
Invasion	47	Left	Pre-menopause	2019-05-10	Positive	Negative	3+	20	High	No	No	53.6	387.4	135.93	1.71	1.67	2.85	227	0.25	13.4	3	0	/
Invasion	48	Left	Menopause	2018-11-14	Negative	Positive	3+	10	High	No	No	32.75	524.9	220.55	1.63	1.46	2.38	322	0.4	13.1	0	5	/
Invasion	48	Left	Pre-menopause	2019-07-26	Positive	Positive	1+	20	Low	No	No	31.1111	1565.87	443.59	4.52564	0.78	3.53	346	0.36	11.2	70	70	/
Invasion	48	Left	Pre-menopause	2020-03-31	Negative	Negative	3+	30	High	No	Yes	33.7931	420.123	181.871	1.35088	1.71	2.31	311	0.29	9.8	0	0	/
Invasion	48	Right	Pre-menopause	2020-05-21	Positive	Positive	2+	20	High	No	No	31.1765	1988.42	446.835	5.63291	0.79	4.45	353	0.34	10.6	60	60	/
Invasion	48	Left	Pre-menopause	2020-07-27	Positive	Positive	2+	20	High	No	No	40.8333	778.81	160.25	3.02	1.61	4.86	258	0.24	9.8	15	5	/
Invasion	49	Right	Pre-menopause	2012-08-14	Positive	Positive	1+	15	Low	No	Yes	63	339.67	95.15	1.73	2.06	3.57	196	0.2	12.6	90	90	/
Invasion	49	Left	Pre-menopause	2018-05-08	Positive	Positive	2+	5	High	No	No	34	444.73	119.23	1.59	2.34	3.73	279	0.3	10.2	90	90	/
Invasion	49	Left	Pre-menopause	2017-02-22	Positive	Positive	3+	20	High	No	Yes	41.6667	291.96	121.145	1.06167	2.27	2.41	275	0.3	12.5	20	30	/
Invasion	49	Left	Menopause	2019-08-26	Negative	Positive	3+	40	High	No	No	48.2759	401.07	121.9	1.57	2	3.81	243	0.3	13.5	0	2	/
Invasion	50	Left	Pre-menopause	2018-05-17	Positive	Positive	1+	10	Low	No	No	35.3333	243.16	117.47	0.9	2.62	3.98	327	0.3	9.4	90	40	/
Invasion	50	Left	Pre-menopause	2020-07-22	Positive	Positive	3+	70	High	No	No	41.7241	1007.13	238.66	3.55	1.56	2.42	209	0.2	14.4	10	2	/
Invasion	50	Right	Pre-menopause	2020-05-22	Positive	Positive	2+	10	High	No	Yes	26.6667	500.903	211.351	1.28108	2.4	4.07	303	0.3	13.2	90	90	/
Invasion	50	Left	Pre-menopause	2015-07-29	Negative	Negative	2+	20	High	No	Yes	41.6667	653.86	121.762	2.78238	1.68	3.03	180	0.2	16.9	0	0	/
Invasion	50	Right	Pre-menopause	2017-05-05	Positive	Positive	1+	20	Low	No	No	68.5	268.32	108.63	1.78	2.45	3.32	389	0.4	11.2	100	10	/
Invasion	51	Left	Menopause	2017-12-05	Positive	Positive	3+	30	High	No	No	37	441.77	167.97	1.72	1.86	1.92	290	0.3	9.8	95	95	/
Invasion	51	Right	Pre-menopause	2018-04-11	Positive	Positive	1+	10	High	No	No	24	797.09	215.43	2.11	3.46	4.55	397	0.4	10.7	40	50	/
Invasion	51	Left	Pre-menopause	2018-09-07	Positive	Positive	3+	50	High	No	No	30.25	778.43	123.36	1.97	2.25	2.47	190	0.2	12.3	0	0	/
Invasion	51	Right	Pre-menopause	2018-11-12	Negative	Negative	3+	50	High	No	No	28.5	609.52	131.93	1.62	1.62	1.91	145	0.2	17.8	90	20	/
Invasion	51	Left	Pre-menopause	2018-02-23	Positive	Negative900/Negative/Positive	3+	5	Intermediate	No	No	/	742.03	154.268	2.93293	2.27	2.41	275	0.3	12.5	80	80	/
Invasion	51	Left	/	2019-08-22	Positive	Positive	2+	20	High	No	No	44.8	401.923	84.6154	1.58863	2.39	3.29	261	0.3	14.5	0	0	/
Invasion	52	Left	Menopause	2014-07-25	Negative	Negative	3+	40	/	No	No	35.6667	546.23	96.68	1.88	1.91	3.59	184	0.2	13.3	0	2	/
Invasion	52	Left	Menopause	2016-05-25	Negative	Positive	1+	60	High	No	No	39	400.99	162.35	1.52	1.3	2.8	196	0.2	12.9	0	0	/
Invasion	52	Left	Pre-menopause	2016-10-24	Negative	Negative	2+	20	High	No	No	31	764.149	139.189	2.47297	2.15	3.5	271	0.3	12	20	0	/
Invasion	52	Right	Pre-menopause	2019-10-09	Positive	Negative	3+	20	High	No	No	38.8462	410.92	158.05	1.49	1.36	3.84	185	0.2	17.7	70	90	/
Invasion	52	Right	Pre-menopause	2016-04-19	Positive	Positive	1+	50	/	No	Yes	44	513.838	126.25	1.69583	2.51	5.16	287	0.3	12.6	80	70	/
Invasion	52	Right	Menopause	2017-11-24	Positive	Positive	1+	10	Intermediate	No	No	32.6667	648.224	204.487	2.03205	1.56	3.17	319	0.3	9.8	90	80	/
Invasion	52	Left	Pre-menopause	2018-05-07	Positive	Positive	0+	10	/	No	No	47.3333	594.846	178.632	2.84615	1.77	3	255	0.3	11.7	0	0	/
Invasion	52	Left	Menopause	2019-07-17	Negative	Negative	3+	60	/	No	No	38.3333	595.495	135.648	2.03241	1.64	4.81	253	0.3	11.5	90	5	/
Invasion	53	Left	/	2018-05-20	Positive	Positive	2+	20	Low	No	No	42.6667	353.111	155.556	1.40123	1.1	2.91	241	0.3	12.1	0	0	/
Invasion	53	Left	Menopause	2018-04-24	Negative	Negative	2+	5	High	No	No	35	484.87	146.49	1.79	1.6	2.23	243	0.3	12.7	80	80	/
Invasion	54	Left	Menopause	2018-01-11	Positive	Positive	1+	10	Low	No	No	72	701.06	148.53	3.47	1.87	2.38	203	0.3	18	0	0	/
Invasion	54	Left	Menopause	2019-07-03	Negative	Negative	3+	40	/	No	No	71.8182	385.843	110.241	2.10843	2.33	3.79	186	0.2	12.7	0	10	/
Invasion	54	Right	Menopause	2019-11-05	Negative	Positive	3+	30	High	No	Yes	25.9459	664.727	145.455	1.66182	1.72	3.84	334	0.3	10.6	3	3	/
Invasion	54	Left	Menopause	2017-01-04	Positive	Positive	3+	15	Intermediate	No	No	63	470.444	162.222	2.14815	1.17	3.33	209	0.3	14.2	100	100	/
Invasion	54	Right	Menopause	2019-05-08	Positive	Positive	2+	10	Intermediate	No	No	39	557.64	149.1	2.24	1.51	4.49	239	0.3	11.7	0	1	/
Invasion	55	Right	Menopause	2018-04-09	Negative	Positive	3+	25	High	No	No	34.3333	317.201	79.3003	1.16618	1.53	1.04	201	0.2	15.6	70	70	/
Invasion	55	Left	Menopause	2018-06-29	Positive	Positive	3+	30	High	No	No	39.3333	705.97	194.48	2.5	1.62	2.27	252	0.3	12.8	0	0	/
Invasion	55	Left	Menopause	2019-08-21	Negative	Negative	3+	25	High	No	No	76.8421	254.28	93.14	1.56	2.34	6.59	320	0.4	14.5	0	1	/
Invasion	55	Right	Menopause	2018-07-17	Negative	Positive	3+	30	High	No	No	34	408.42	183.15	1.25	1.48	2.64	278	0.3	11.2	40	0	/
Invasion	55	Left	Menopause	2019-08-21	Positive	Negative	3+	10	/	No	Yes	55	212.521	111.268	0.896714	2.31	3.03	212	0.2	12	90	80	/
Invasion	55	Right	/	2020-07-12	Positive	Positive	1+	20	Intermediate	No	No	41.1111	429.203	95.8042	1.56643	1.28	3.98	351	0.3	10.2	90	70	/
Invasion	55	Left	Menopause	2020-07-15	Positive	Positive	2+	30	High+Low	Yes	No	55.8333	318.886	100.913	1.44292	1.8	3.75	196	0.3	17.9	20	0	/
Invasion	55	Left	Menopause	2015-12-04	Positive	Negative	3+	5	/	No	No	35	437.369	113.308	1.46768	2.1	4.11	292	0.3	11.7	0	0	/
Invasion	55	Left	Menopause	2019-05-09	Negative	Negative	3+	20	High	No	No	40.6667	305.58	146.91	1.28	1.29	2.67	205	0.2	9.8	5	2	/
Invasion	56	Left	Menopause	2016-04-01	Positive	Positive	2+	25	High	No	No	53.5	500.333	79.1667	2.19444	2.88	6.32	228	0.2	10.7	80	20	/
Invasion	56	Left	Menopause	2018-09-26	Positive	Positive	2+	30	High	No	No	33.6667	782.19	164.67	2.84	2.76	3.71	392	0.4	11.3	0	0	/
Invasion	56	Right	Menopause	2019-11-05	Negative	Negative	3+	30	High	No	No	37.25	661.42	147.64	1.92	1.4	2.57	321	0.3	12	0	0	/
Invasion	56	Left	Menopause	2019-11-18	Negative	Negative	2+	20	High+Intermediate	Yes	No	42.2222	662.23	190.85	2.44	1.72	3.97	252	0.3	12.3	0	0	/
Invasion	56	Right	Menopause	2016-11-26	Negative	Negative	3+	25	High	No	No	56.5	510.808	149.359	2.19231	2.49	3.21	193	0.2	13.3	0	0	/
Invasion	56	Right	Menopause	2017-08-16	Negative	Positive	3+	15	High	No	No	49	289.58	108.46	1.33	1.71	4.8	262	0.31	14.3	0	20	/
Invasion	57	Left	Menopause	2016-11-28	Negative900/Negative/Positive	Negative900/Negative/Positive	1+	20	High	No	No	82.5	211.5	85.63	1.48	1.94	4	204	0.23	13.5	50	1	/
Invasion	57	Left	Menopause	2018-12-04	Positive	Positive	3+	10	/	No	No	43.6667	451.87	132.51	1.68	1.6	3.59	167	0.23	17.9	20	1	/
Invasion	57	Right	Menopause	2020-05-19	Negative	Negative	3+	10	High	No	Yes	56.4706	536.23	131.43	2.91	2.16	4.39	293	0.3	11.5	0	0	/
Invasion	57	Right	Menopause	2020-08-06	Positive	Negative	3+	20	High	No	No	48.4375	482.02	154.49	1.75	1.24	4.49	332	0.38	15.7	2	0	/
Invasion	57	Right	Pre-menopause	2018-04-25	Positive	Positive	2+	5	Intermediate	No	No	63.5	167.43	87.2	0.91	0.78	3.53	346	0.36	11.2	100	80	/
Invasion	57	Left	Pre-menopause	2019-10-14	Negative	Negative	3+	15	High	No	No	47.9167	438.16	157.05	1.87	2.13	1.91	237	0.28	15.4	0	0	/
Invasion	57	Left	Menopause	2020-06-24	Positive	Positive	3+	50	High	No	No	55	663.48	190.65	3.25	2.99	4.75	253	0.25	11.2	60	20	/
Invasion	58	Right	Menopause	2018-05-10	Positive	Positive	2+	10	/	No	No	45.5	396.04	118.22	1.42	1.68	3.13	216	0.24	13.2		70	/
Invasion	58	Left	Menopause	2017-11-01	Negative	Negative	3+	30	/	No	No	42	590.008	114.343	2.05578	1.86	3.23	240	0.25	12.3	0	0	/
Invasion	58	Right	Menopause	2014-07-02	Negative	Negative	3+	40	High	No	No	43.6667	252.72	97.2	1.04	2.33	4.48	344	0.4	14.9	0	0	/
Invasion	58	Left	Menopause	2017-09-22	Negative	Negative	3+	25	High	No	No	48.6667	355.95	88.54	1.24	2.75	4.57	400	0.37	9.6	0	0	/
Invasion	58	Right	Menopause	2019-05-23	Positive	Positive	1+	20	Intermediate	No	No	46.25	361.66	153.9	1.53	1.71	2.31	311	0.29	9.8	95	70	/
Invasion	59	Left	Menopause	2018-08-15	Negative	Negative	3+	20	High	No	No	26	756.939	175.217	1.87826	1.18	2.72	232	0.24	11	0	0	/
Invasion	59	Left	Menopause	2019-11-19	Negative	Negative	3+	30	High	No	Yes	57.619	252.48	126.88	1.24	2.08	5.92	378	0.39	22.5	0	0	/
Invasion	59	Right	Menopause	2020-06-22	Positive	Positive	3+	10	High	No	No	41.3333	388.54	106.74	1.36	1.32	7.84	262	0.27	11.6	5	10	/
Invasion	59	Left	Menopause	2018-04-02	Positive	Positive	2+	30	High	No	No	60	258.364	108.556	1.27273	0.79	4.45	353	0.34	10.6	80	60	/
Invasion	59	Left	Menopause	2018-05-16	Negative	Negative	2+	30	High	No	No	78	136.627	131.373	0.679739	1.85	2.37	391	0.36	9.6	0	0	/
Invasion	59	Right	Menopause	2020-06-11	Positive	Positive	2+	50	High	No	No	42.8571	1022.91	232.479	3.76068	1.42	3.6	280	0.29	12.3	80	80	/
Invasion	59	Left	Menopause	2018-01-29	Positive	Positive	1+	15	Intermediate	No	No	47	747.74	206.56	2.97	1.17	4.4	272	0.28	12	90	10	/
Invasion	60	Left	Menopause	2016-02-25	Positive	Positive	2+	5	Low	No	No	64.5	211.543	72.695	1.03191	2.52	4.22	253	0.28	13.7	80	60	/
Invasion	60	Left	Pre-menopause	2016-11-21	Negative	Negative	3+	20	High	No	No	30.75	424.01	125.45	1.21	2.86	4.48	274	0.27	11.1	0	0	/
Invasion	60	Right	Menopause	2019-06-26	Negative	Negative	3+	30	High	No	No	39.1667	345.623	127.536	1.30918	2.19	3.16	221	0.24	13.4	0	0	/
Invasion	60	Right	Menopause	2015-11-27	Positive	Positive	3+	15	High	No	No	62.5	353.63	107.81	1.71	2.36	5	295	0.29	10.5	10	50	/
Invasion	60	Right	Menopause	2018-03-30	Positive	Positive	2+	10	/	No	Yes	42.3333	338.681	151.875	1.39375	1.62	2.21	162	0.16	11.1	80	10	/
Invasion	61	Left	Menopause	2019-07-16	Positive	Negative	2+	10	High	No	No	81.25	231.55	100.68	1.55	2.87	3.29	332	3.29	7.9	5	0	/
Invasion	61	Right	Menopause	2015-09-08	Positive	Positive	3+	30	High	No	No	45	462.915	121.5	1.905	1.68	4.26	201	0.23	14.1	30	2	/
Invasion	61	Left	Menopause	2017-02-28	Positive	Positive	2+	10	Low	No	Yes	48.3333	359.285	109.205	1.37657	2.39	3.29	261	0.3	14.5	90	60	neoadjuvent therapy
Invasion	61	Right	Menopause	2020-06-29	Negative	Positive	3+	20	High	No	Yes	48.9286	423.675	100.397	1.6746	2.52	4.22	253	0.28	13.7	0	5	/
Invasion	61	Right	Pre-menopause	2019-06-28	Negative	Negative	3+	10	High	No	No	61.5	358.86	114.29	1.95	1.93	5.37	235	0.3	12.5	0	0	/
Invasion	62	Right	Pre-menopause	2014-09-11	Negative	Negative	1+	30	/	No	Yes	55	394.57	126.061	1.89697	2.63	3.86	298	0.3	10.5	0	0	/
Invasion	62	Right	Menopause	2018-11-19	Negative	Negative	2+	10	Intermediate	No	No	49	424.302	158.915	2.06977	3.79	3.37	257	0.3	11.4	0	0	/
Invasion	63	Left	Menopause	2018-05-10	Positive	Positive	0+	10	/	No	No	44.3333	525.24	168.35	2.24	1.56	3.42	233	0.2	11.3	90	90	/
Invasion	63	Right	Menopause	2018-11-23	Positive	Positive	0+	10	Low	No	No	63	285.88	104.72	1.29	2.12	2.73	222	0.2	12.6	90	90	/
Invasion	64	Right	Menopause	2016-10-31	Negative	Positive	3+	20	High	No	No	57.5	520.87	163.28	2.49	1.35	2.9	219	0.2	12.6	0	1	/
Invasion	64	Right	Menopause	2016-11-08	Negative	Negative	2+	15	Intermediate	No	Yes	42.3333	349.85	119.4	1.46	2.01	2.93	240	0.3	12.7	0	0	/
Invasion	65	Left	Menopause	2020-07-10	Positive	Positive	1+	10	High+Low	Yes	No	56.3636	259.35	79.55	1.21	2.69	3.26	214	0.22	12.4	80	50	/
Invasion	65	Left	Menopause	2020-05-25	Positive	Positive	2+	5	Intermediate	No	Yes	42.4138	709.859	197.183	2.53521	1.42	3.6	280	0.29	12.3	90	40	neoadjuvent therapy
Invasion	65	Right	Menopause	2020-07-20	Positive	Positive	2+	25	High	No	No	69.375	221	100	1.3642	1.62	2.21	162	0.16	11.1	90	1	/
Invasion	65	Right	Menopause	2020-08-10	Positive	Positive	2+	70	High	No	No	76.6667	391.73	93.05	2.25	1.87	4.21	174	0.21	16.1	5	2	/
Invasion	66	Right	Menopause	2017-08-29	Negative	Negative	1+	20	Intermediate	No	No	29.3333	453.63	148.73	1.55	1.97	3.05	293	0.3	8.8	0	0	/
Invasion	66	Left	Menopause	2018-09-05	Positive	Positive	1+	20	/	No	No	59.6667	408.333	108.889	2.08333	1.8	3.75	196	0.3	17.9	90	20	/
Invasion	66	Right	Menopause	2016-01-18	Positive	Positive	1+	5	/	No	No	41.3333	404.51	121.11	1.86	1.8	3.34	218	0.3	12.4	95	95	/
Invasion	67	Right	Menopause	2014-06-26	Negative	Negative	3+	10	High	No	No	64.5	624.75	121.55	2.84	1.81	5.14	220	0.2	12.9	0	0	/
Invasion	68	Left	Menopause	2015-04-09	Negative	Positive	3+	20	High	No	No	37	441.77	167.97	1.72	1.53	2.63	257	0.3	11.1	0	5	/
Invasion	68	Left	Menopause	2016-11-11	Negative	Positive	3+	60	High	No	Yes	82.5	362.78	93.26	2.19	1.78	3.89	166	0.2	16.5	0	50	/
Invasion	68	Right	Menopause	2018-07-20	Positive	Negative	3+	40	High	No	No	60	278.078	91.7749	1.31169	2.31	3.03	212	0.2	12	50	0	/
Invasion	68	Left	Menopause	2017-03-16	Negative	Negative	1+	20	High	No	No	51.3333	248.95	88.28	1.1	2.56	2.82	226	0.3	15.4	0	0	/
Invasion	69	Right	Menopause	2015-12-16	Positive	Negative	3+	15	High	No	No	79	200.51	74.26	0.99	2.72	2.7	202	0.2	15.8	5	0	/
Invasion	70	Left	Menopause	2019-04-10	Negative	Positive	3+	5	Intermediate	No	No	36.6667	765.44	181.38	2.24	1.88	4.22	341	0.3	11	0	1	/
Invasion	70	Left	Menopause	2017-09-08	Positive	Negative	1+	30	Low	No	Yes	40	441.163	126.047	1.62791	2.15	3.5	271	0.3	12	80	0	/
Invasion	71	Left	Menopause	2018-05-21	Negative	Negative	2+	20	Intermediate	No	No	41.6667	299.681	135.602	1.15707	1.91	2.21	259	0.3	12.5	0	0	/
Invasion	71	Left	Menopause	2019-08-07	Negative	Negative	3+	20	High	No	No	105	348.54	76.43	2.9	1.57	4.56	120	0.12	12.6	0	0	/
Invasion	72	Left	Menopause	2018-07-16	Positive	Positive	2+	2	Intermediate	No	No	73	223.25	58.75	1.58	2.4	3.8	141	0.2	14.6	90	90	/
Invasion	73	Left	Menopause	2018-05-10	Positive	Positive	2+	10	High	No	No	41.6667	272.46	68.29	1.14	2.45	3.67	294	0.3	11.6	80	80	/
Invasion	75	Right	Menopause	2020-08-13	Positive	Positive	0+	10	Intermediate	No	No	58.6364	209.95	79.53	1.04	2.54	2.64	202	0.22	12.9	100	100	/
Invasion	79	Left	Menopause	2016-03-24	Positive	Positive	2+	10	/	No	No	38	228.52	67.81	0.889182	3.79	3.37	257	0.3	11.4	75	75	/
Invasion	80	Right	Pre-menopause	2014-12-31	Positive	Positive	1+	15	/	No	No	39.6667	663.43	128.57	2.05	2.52	5.16	324	0.3	11.9	10	40	/
Invasion	84	Left	Menopause	2016-05-04	Positive	Positive	1+	5	/	No	No	84.5	324.643	107.143	1.80357	1.68	3.03	180	0.2	16.9	90	70	/
Invasion	40	Right	Pre-menopause	2019-06-10	Positive	Positive	2+	20	Intermediate	No	Yes	43.4783	350.83	95.08	1.4	2.64	3.69	251	0.23	10	90	40	/
Invasion	46	Right	Pre-menopause	2015-12-23	Positive	Positive	2+	10	High	No	Yes	65	362.65	159.76	1.38	1.64	2.27	262	0.3	19.5	90	90	/
