# Supplementary material for: An insight into the invasion of breast ductal carcinoma in situ based on clinical, pathological and hematological data
Source: PeerJ. 2022 Aug 31;10:e13966. doi: 10.7717/peerj.13966 (PMC9440660; doi:10.7717/peerj.13966)
Supplement: Supplemental Information 2 [file peerj-10-13966-s002.xlsx]

## Sheet: Sheet1
Group	Age	Anatomic neoplasm subdivisions	Menstruation	Time	DCIS-ER	DCIS-PR	DCIS-HER-2	DCIS-Ki-67	DCIS Grade	DCIS-Mixed	Metastasis of LN	DCIS-ER	IDC-ER	DCIS-PR	IDC-PR	IDC-HER-2	IDC-Ki-67	IDC Grade
Invasion	29	Left	Pre-menopause	2019-07-10	3	0	3	20	3	no	no	3	50	0	1	2	10	2
Invasion	29	Left	Pre-menopause	2020-05-19	0	1	3	20	3	no	no	0	0	1	3	3	20	2
Invasion	29	Right	Pre-menopause	2014-07-11	0	0	3	20	3	no	no	0	0	0	0	3	50	/
Invasion	29	Right	Pre-menopause	2020-05-19	80	10	3	30	3	no	no	80	10	10	0	3	40	2
Invasion	31	Left	Pre-menopause	2015-12-10	60	20	2	15	3	no	no	60	80	20	80	2	40	2
Invasion	32	Right	Pre-menopause	2019-06-03	80	90	2	10	2	no	no	80	85	90	85	0	10	2
Invasion	33	Right	Pre-menopause	2017-08-21	80	60	1	10	2	no	yes	80	80	60	/	1	15	/
Invasion	33	Left	Pre-menopause	2019-04-25	90	90	3	50	3	no	/	90	90	90	60	2	30	2
Invasion	34	Left	Pre-menopause	2016-11-23	70	70	2	40	2	no	no	70	/	70	/	/	/	2
Invasion	35	Left	Pre-menopause	2019-06-25	0	0	3	10	3	no	no	0	0	0	0	3	30	2
Invasion	35	Left	Pre-menopause	2020-05-14	0	3	3	60	3	no	yes	0	/	3	/	3	/	/
Invasion	37	Right	Menopause	2020-07-10	70	40	2	10	3	no	no	70	70	40	70	3	20	2
Invasion	37	Left	Pre-menopause	2016-09-26	90	60	2	50	3	no	yes	90	75	60	15	3	75	/
Invasion	37	Left	Pre-menopause	2018-04-24	80	30	3	60	/	no	yes	80	/	30	/	/	/	2
Invasion	37	Left	Menopause	2018-05-10	80	80	2	20	/	no	yes	80	/	80	/	/	/	/
Invasion	37	Right	Pre-menopause	2019-06-25	0	0	3	20	3	no	yes	0	/	0	/	3	60	/
Invasion	37	Left	Pre-menopause	2016-12-10	0	0	3	30	3	no	yes	0	/	0	/	/	/	/
Invasion	38	Right	Pre-menopause	2018-09-12	100	100	0	/	1	no	yes	100	80	100	80	2	40	/
Invasion	39	Left	Pre-menopause	2017-08-17	90	80	3	20	/	no	yes	90	80	80	80	1	40	2
Invasion	39	Right	Pre-menopause	2017-10-24	10	10	3	20		no	yes	10	2	10	2	2	70	2
Invasion	39	Right	Pre-menopause	2017-11-26	80	80	1	15	2	no	no	80	80	80	80	0	30	/
Invasion	39	Left	Pre-menopause	2016-12-21	0	0	2	30	3	no	yes	0	0	0	0	1	70	2
Invasion	39	Right	Pre-menopause	2017-09-05	20	20	2	30	3	no	yes	20	0	20	/	1	30	/
Invasion	39	Left	Pre-menopause	2017-12-26	90	70	3	30	/	no	yes	90	60	70	60	3	50	2
Invasion	39	Right	Pre-menopause	2018-03-29	50	20	3	30	/	no	no	50	1	20	10	3	10	2
Invasion	39	Right	Pre-menopause	2018-05-02	90	90	2	15	/	no	no	90	70	90	70	1	5	2
Invasion	40	Right	Pre-menopause	2018-11-08	90	50	0	30	3	yes	no	90	90	50	30	0	20	/
Invasion	40	Left	Pre-menopause	2016-03-28	75	75	2	15	3	no	yes	75	75	75	/	1	15	/
Invasion	40	Left	Pre-menopause	2020-08-28	95	95	2	10	2	yes	yes	95	80	95	90	2	30	2
Invasion	40	Right	Pre-menopause	2018-04-21	1	5	2	10	/	no	no	1	/	5	/	/	/	/
Invasion	41	Left	Pre-menopause	2018-03-01	0	0	3	85	3	no	no	0	0	0	0	3	60	2
Invasion	41	Left	Pre-menopause	2018-11-21	70	70	2	5	3	no	no	70	70	70	7	2	60	2
Invasion	41	Left	Pre-menopause	2019-04-28	90	90	0	8	/	no	no	90	90	90	70	2	15	/
Invasion	41	Right	Pre-menopause	2019-05-10	95	95	0	40	/	no	/	95	90	95	90	1	5	2
Invasion	41	Left	Pre-menopause	2019-10-11	100	100	2	5	1	no	no	100	80	100	50	2	30	2
Invasion	41	Right	Pre-menopause	2018-04-26	100	80	2	5	3	no	no	100	/	80	/	/	/	/
Invasion	41	Left	Pre-menopause	2020-06-29	20	5	3	50	3	no	no	20	0	5	0	2	10	/
Invasion	42	Right	Menopause	2019-05-06	90	50	2	50	/	no	/	90	90	50	70	2	50	2
Invasion	42	Left	Pre-menopause	2019-10-16	95	95	0	10	3	no	no	95	95	95	85	1	15	2
Invasion	42	Left	Pre-menopause	2020-07-16	90	90	1	30	3	yes	yes	90	90	90	90	2	40	2
Invasion	43	Left	Pre-menopause	2018-06-25	0	0	3	10	3	no	no	0	70	0	70	2	30	2
Invasion	43	Right	Pre-menopause	2018-05-21	90	80	3	10	2	no	yes	90	90	80	/	2	/	/
Invasion	43	Right	Pre-menopause	2019-05-06	90	90	2	40	/	no	no	90	85	90	90	1	30	2
Invasion	43	Right	Pre-menopause	2019-07-17	0	0	3	5	3	no	no	0	90	0	90	1	20	2
Invasion	43	Left	Pre-menopause	2020-04-22	90	90	2	20	2	no	no	90	90	90	90	2	30	2
Invasion	44	Left	Pre-menopause	2019-11-29	50	90	2	10	3	no	no	50	90	90	90	1	30	2
Invasion	44	Left	Pre-menopause	2019-05-29	90	75	2	10	/	no	no	90	80	75	80	1	40	2
Invasion	44	Right	Pre-menopause	2017-08-25	90	90	2	20	2	no	no	90	/	90	/	/	/	/
Invasion	44	Left	Pre-menopause	2018-09-28	0	20	3	20	3	no	no	0	/	20	/	/	/	/
Invasion	45	Left	Pre-menopause	2017-05-04	95	95	2	70	/	no	no	95	75	95	>75	0	50	2
Invasion	45	Left	Menopause	2020-08-12	95	95	0	10	3	yes	no	95	80	95	80	2	25	1
Invasion	45	Left	Pre-menopause	2015-11-23	90	80	3	40	/	no	no	90	/	80	/	/	/	2
Invasion	46	Left	Pre-menopause	2014-12-30	40	10	2	15	/	no	no	40	50	10	50	2	40	2
Invasion	46	Left	Pre-menopause	2018-05-18	90	90	3	30	1	no	no	90	90	90	90	0	8	/
Invasion	46	Right	Menopause	2020-07-20	80	95	2	20	2	no	no	80	80	95	90	2	10	/
Invasion	46	Left	Pre-menopause	2016-11-16	90	90	2	30	/	no	yes	90	90	90	90	0	30	2
Invasion	46	Right	Pre-menopause	2016-12-23	90	90	1	15	/	no	no	90	75	90	90	1	5	1
Invasion	46	Left	Pre-menopause	2017-09-14	90	70	1	20	2	no	yes	90	90	70	/	0	20	2
Invasion	46	Left	Pre-menopause	2019-04-24	90	80	0	20	/	no	no	90	90	80	90	0	40	2
Invasion	46	Left	Pre-menopause	2019-07-10	90	90	2	5	1	no	yes	90	90	90	90	1	40	2
Invasion	47	Right	Pre-menopause	2016-01-21	95	90	0	5	/	no	no	95	/	90	/	/	/	/
Invasion	47	Right	Pre-menopause	2018-07-20	90	90	0	30	3	no	no	90	90	90	80	0	25	2
Invasion	47	Left A，Right B	Pre-menopause	2019-04-02	90	90	2	20	3	yes	no	90	90	90	50	1	5	1
Invasion	47	Right	Menopause	2020-06-22	90	90	2	10	2	no	no	90	40	90	40	2	3	2
Invasion	47	Left	Pre-menopause	2018-07-03	5	20	3	30	3	no	yes	5	70	20	2	2	40	2
Invasion	47	Left	Pre-menopause	2018-07-24	10	80	1	50	2	no	no	10	95	80	95	0	50	2
Invasion	47	Left	Pre-menopause	2019-05-10	3	0	3	20	3	no	no	3	0	0	0	0	15	/
Invasion	48	Left	Menopause	2018-11-14	0	5	3	10	3	no	no	0	0	5	3	3	15	2
Invasion	48	Left	Pre-menopause	2019-07-26	70	70	1	20	1	no	no	70	90	70	90	2	40	2
Invasion	48	Left	Pre-menopause	2020-03-31	0	0	3	30	3	no	yes	0	0	0	0	3	30	3
Invasion	48	Right	Pre-menopause	2020-05-21	60	60	2	20	3	no	no	60	/	60	/	2	/	/
Invasion	48	Left	Pre-menopause	2020-07-27	15	5	2	20	3	no	no	15	70	5	70	2	40	2
Invasion	49	Right	Pre-menopause	2012-08-14	90	90	1	15	1	no	yes	90	/	90	/	/	/	/
Invasion	49	Left	Pre-menopause	2018-05-08	90	90	2	5	3	no	no	90	90	90	90	2	20	2
Invasion	49	Left	Pre-menopause	2017-02-22	20	30	3	20	3	no	yes	20	0	30	0	3	15	2
Invasion	49	Left	Menopause	2019-08-26	0	2	3	40	3	no	no	0	/	2	/	/	/	/
Invasion	50	Left	Pre-menopause	2018-05-17	90	40	1	10	1	no	no	90	99	40	99	0	5	1
Invasion	50	Left	Pre-menopause	2020-07-22	10	2	3	70	3	no	no	10	1	2	1	3	70	2
Invasion	50	Right	Pre-menopause	2020-05-22	90	90	2	10	3	no	yes	90	95	90	95	0	20	2
Invasion	50	Left	Pre-menopause	2015-07-29	0	0	2	20	3	no	yes	0	/	0	/	/	/	/
Invasion	50	Right	Pre-menopause	2017-05-05	100	10	1	20	1	no	no	100	/	10	/	/	/	/
Invasion	51	Left	Menopause	2017-12-05	1	1	3	30	3	no	no	1	/	1	/	/	/	/
Invasion	51	Right	Pre-menopause	2018-04-11	95	95	1	10	3	no	no	95	95	95	95	1	30	2
Invasion	51	Left	Pre-menopause	2018-09-07	40	60	3	50	3	no	no	40	0	60	10	3	30	/
Invasion	51	Right	Pre-menopause	2018-11-12	0	0	3	50	3	no	no	0	0	0	2	3	70	/
Invasion	51	Left	Pre-menopause	2018-02-23	90	20	3	5	2	no	no	90	90	20	0	2	10	2
Invasion	51	Left	/	2019-08-22	80	80	2	20	3	no	no	80	80	80	80	2	30	2
Invasion	52	Left	Menopause	2014-07-25	0	0	3	40	/	no	no	0	/	0	/	/	/	/
Invasion	52	Left	Menopause	2016-05-25	0	2	1	60	3	no	no	0	0	2	25	1	50	2
Invasion	52	Left	Pre-menopause	2016-10-24	0	0	2	20	3	no	no	0	/	0	/	/	/	/
Invasion	52	Right	Pre-menopause	2019-10-09	20	0	3	20	3	no	no	20	70	0	10	3	15	2
Invasion	52	Right	Pre-menopause	2016-04-19	70	90	1	50	/	no	yes	70	30	90	/	1	10	2
Invasion	52	Right	Menopause	2017-11-24	80	70	1	10	2	no	no	80	70	70	0	2	10	1
Invasion	52	Left	Pre-menopause	2018-05-07	90	80	0	10	/	no	no	90	90	80	/	3	5	2
Invasion	52	Left	Menopause	2019-07-17	0	0	3	60	/	no	no	0	0	0	0	3	70	2
Invasion	53	Left	/	2018-05-20	90	5	2	20	1	no	no	90	90	5	0	1	2	1
Invasion	53	Left	Menopause	2018-04-24	0	0	2	5	3	no	no	0	/	0	/	/	/	/
Invasion	54	Left	Menopause	2018-01-11	80	80	1	10	1	no	no	80	80	80	80	2	25	2
Invasion	54	Left	Menopause	2019-07-03	0	0	3	40	/	no	no	0	90	0	90	2	50	2
Invasion	54	Right	Menopause	2019-11-05	0	10	3	30	3	no	yes	0	10	10	1	3	30	3
Invasion	54	Left	Menopause	2017-01-04	3	3	3	15	2	no	no	3	/	3	/	/	/	/
Invasion	54	Right	Menopause	2019-05-08	100	100	2	10	2	no	no	100	/	100	/	/	/	/
Invasion	55	Right	Menopause	2018-04-09	0	1	3	25	3	no	no	0	0	1	0	3	20	2
Invasion	55	Left	Menopause	2018-06-29	70	70	3	30	3	no	no	70	0	70	0	3	40	2
Invasion	55	Left	Menopause	2019-08-21	0	0	3	25	3	no	no	0	0	0	0	3	30	3
Invasion	55	Right	Menopause	2018-07-17	0	1	3	30	3	no	no	0	0	1	0	3	5	/
Invasion	55	Left	Menopause	2019-08-21	40	0	3	10	/	no	yes	40	40	0	10	2	50	3
Invasion	55	Right	/	2020-07-12	90	80	1	20	2	no	no	90	90	80	90	1	20	2
Invasion	55	Left	Menopause	2020-07-15	90	70	2	30	3	yes	no	90	90	70	80	1	20	2
Invasion	55	Left	Menopause	2015-12-04	20	0	3	5	/	no	no	20	/	0	/	/	/	/
Invasion	55	Left	Menopause	2019-05-09	0	0	3	20	3	no	no	0	/	0	/	/	/	/
Invasion	56	Left	Menopause	2016-04-01	5	2	2	25	3	no	no	5	75	2	0	2	50	2
Invasion	56	Left	Menopause	2018-09-26	80	20	2	30	3	no	no	80	90	20	10	1	60	2
Invasion	56	Right	Menopause	2019-11-05	0	0	3	30	3	no	no	0	5	0	0	3	25	2
Invasion	56	Left	Menopause	2019-11-18	0	0	2	20	3	yes	no	0	0	0	0	2	40	3
Invasion	56	Right	Menopause	2016-11-26	0	0	3	25	3	no	no	0	80	0	60	0	30	/
Invasion	56	Right	Menopause	2017-08-16	0	20	3	15	3	no	no	0	/	20	/	/	/	/
Invasion	57	Left	Menopause	2016-11-28	50	1	1	20	3	no	no	50	5	1	<1	1	30	2
Invasion	57	Left	Menopause	2018-12-04	20	1	3	10	/	no	no	20	0	1	10	3	50	2
Invasion	57	Right	Menopause	2020-05-19	0	0	3	10	3	no	yes	0	0	0	0	3	30	2
Invasion	57	Right	Menopause	2020-08-06	2	0	3	20	3	no	no	2	10	0	1	3	30	/
Invasion	57	Right	Pre-menopause	2018-04-25	100	80	2	5	2	no	no	100	/	80	/	/	/	/
Invasion	57	Left	Pre-menopause	2019-10-14	0	0	3	15	3	no	no	0	0	0	0	0	40	/
Invasion	57	Left	Menopause	2020-06-24	60	20	3	50	3	no	no	60	/	20	/	/	/	/
Invasion	58	Right	Menopause	2018-05-10		70	2	10	/	no	no		80	70	60	2	40	/
Invasion	58	Left	Menopause	2017-11-01	0	0	3	30	/	no	no	0	0	0	0	3	5	2
Invasion	58	Right	Menopause	2014-07-02	0	0	3	40	3	no	no	0	/	0	/	/	/	/
Invasion	58	Left	Menopause	2017-09-22	0	0	3	25	3	no	no	0	/	0	/	/	/	/
Invasion	58	Right	Menopause	2019-05-23	95	70	1	20	2	no	no	95	60	70	5	0	20	/
Invasion	59	Left	Menopause	2018-08-15	0	0	3	20	3	no	no	0	95	0	0	3	30	2
Invasion	59	Left	Menopause	2019-11-19	0	0	3	30	3	no	yes	0	0	0	0	3	60	3
Invasion	59	Right	Menopause	2020-06-22	5	10	3	10	3	no	no	5	70	10	70	3	15	2
Invasion	59	Left	Menopause	2018-04-02	80	60	2	30	3	no	no	80	90	60	30	1	20	2
Invasion	59	Left	Menopause	2018-05-16	0	0	2	30	3	no	no	0	0	0	5	1	30	2
Invasion	59	Right	Menopause	2020-06-11	80	80	2	50	3	no	no	80	0	80	5	2	80	3
Invasion	59	Left	Menopause	2018-01-29	90	10	1	15	2	no	no	90	/	10	/	/	/	/
Invasion	60	Left	Menopause	2016-02-25	80	60	2	5	1	no	no	80	/	60	/	/	/	/
Invasion	60	Left	Pre-menopause	2016-11-21	0	0	3	20	3	no	no	0	/	0	/	/	/	/
Invasion	60	Right	Menopause	2019-06-26	0	0	3	30	3	no	no	0	0	0	0	2	10	2
Invasion	60	Right	Menopause	2015-11-27	10	50	3	15	3	no	no	10	5	50	5	3	10	/
Invasion	60	Right	Menopause	2018-03-30	80	10	2	10	/	no	yes	80	90	10	0	2	30	2
Invasion	61	Left	Menopause	2019-07-16	5	0	2	10	3	no	no	5	60	0	0	3	15	3
Invasion	61	Right	Menopause	2015-09-08	30	2	3	30	3	no	no	30	20	2	/	3	20	/
Invasion	61	Left	Menopause	2017-02-28	90	60	2	10	1	no	yes	90	90	60	/	1	10	/
Invasion	61	Right	Menopause	2020-06-29	0	5	3	20	3	no	yes	0	0	5	0	2	30	2
Invasion	61	Right	Pre-menopause	2019-06-28	0	0	3	10	3	no	no	0	0	0	0	3	10	2
Invasion	62	Right	Pre-menopause	2014-09-11	0	0	1	30	/	no	yes	0	20	0	0	2	10	2
Invasion	62	Right	Menopause	2018-11-19	0	0	2	10	2	no	no	0	0	0	0	1	30	2
Invasion	63	Left	Menopause	2018-05-10	90	90	0	10	/	no	no	90	90	90	90	0	10	2
Invasion	63	Right	Menopause	2018-11-23	90	90	0	10	1	no	no	90	/	90	/	/	/	/
Invasion	64	Right	Menopause	2016-10-31	0	1	3	20	3	no	no	0	/	1	/	/	/	2
Invasion	64	Right	Menopause	2016-11-08	0	0	2	15	2	no	yes	0	0	0	0	1	10	2
Invasion	65	Left	Menopause	2020-07-10	80	50	1	10	3+1	yes	no	80	80	50	80	1	10	/
Invasion	65	Left	Menopause	2020-05-25	90	40	2	5	2	no	yes	90	90	40	/	2	/	/
Invasion	65	Right	Menopause	2020-07-20	90	1	2	25	3	no	no	90	90	1	70	2	25	2
Invasion	65	Right	Menopause	2020-08-10	5	2	2	70	3	no	no	5	/	2	/	/	/	/
Invasion	66	Right	Menopause	2017-08-29	0	0	1	20	2	no	no	0	/	0	/	/	/	/
Invasion	66	Left	Menopause	2018-09-05	90	20	1	20	/	no	no	90	90	20	10	1	20	1
Invasion	66	Right	Menopause	2016-01-18	95	95	1	5	/	no	no	95	/	95	/	/	/	/
Invasion	67	Right	Menopause	2014-06-26	0	0	3	10	3	no	no	0	/	0	/	/	/	/
Invasion	68	Left	Menopause	2015-04-09	0	5	3	20	3	no	no	0	/	5	/	2	/	/
Invasion	68	Left	Menopause	2016-11-11	0	50	3	60	3	no	yes	0	/	50	/	/	/	2
Invasion	68	Right	Menopause	2018-07-20	50	0	3	40	3	no	no	50	60	0	1	3	40	3
Invasion	68	Left	Menopause	2017-03-16	0	0	1	20	3	no	no	0	/	0	/	/	/	/
Invasion	69	Right	Menopause	2015-12-16	5	0	3	15	3	no	no	5	3	0	1	3	40	2
Invasion	70	Left	Menopause	2019-04-10	0	1	3	5	2	no	no	0	90	1	70	2	5	/
Invasion	70	Left	Menopause	2017-09-08	80	0	1	30	1	no	yes	80	60	0	0	0	30	2
Invasion	71	Left	Menopause	2018-05-21	0	0	2	20	2	no	no	0	0	0	0	2	20	3
Invasion	71	Left	Menopause	2019-08-07	0	0	3	20	3	no	no	0	0	0	0	2	15	3
Invasion	72	Left	Menopause	2018-07-16	90	90	2	2	2	no	no	90	90	90	90	1	30	2
Invasion	73	Left	Menopause	2018-05-10	80	80	2	10	3	no	no	80	80	80	/	2	10	/
Invasion	75	Right	Menopause	2020-08-13	100	100	0	10	2	no	no	100	95	100	70	1	15	/
Invasion	79	Left	Menopause	2016-03-24	75	75	2	10	/	no	no	75	/	75	/	/	/	/
Invasion	80	Right	Pre-menopause	2014-12-31	10	40	1	15	/	no	no	10	1	40	5	1	30	2
Invasion	84	Left	Menopause	2016-05-04	90	70	1	5	/	no	no	90	90	70	90	0	8	/
Invasion	40	Right	Pre-menopause	2019-06-10	90	40	2	20	2	no	yes
Invasion	46	Right	Pre-menopause	2015-12-23	90	90	2	10	3	no	yes
