# Supplementary material for: An insight into the invasion of breast ductal carcinoma in situ based on clinical, pathological and hematological data
Source: PeerJ. 2022 Aug 31;10:e13966. doi: 10.7717/peerj.13966 (PMC9440660; doi:10.7717/peerj.13966)
Supplement: Supplemental Information 3 [file peerj-10-13966-s003.xlsx]

## Sheet: Sheet1
Group	Age	Breast Surgery	Axillary surgery	Anatomic neoplasm subdivisions	Menstruation	ER	PR	HER2	lym	neu	plate	sii
Non-invasion	33	mastectomy	ALND	Left	Pre-menopause	60	70	3+	2.34	3.59	314	481.735
Invasion	38	mastectomy	ALND	Left	Pre-menopause	80	90	3+	1.546	2.17	329	461.792
Non-invasion	40	mastectomy	SLNB	Left	Pre-menopause	90	60	0+	2.71	3.11	352	403.956
Non-invasion	42	lumpectomy	SLNB	Left	Pre-menopause	80	90	3+	1.51	2.11	351	490.47
Non-invasion	43	mastectomy	ALND	Right	Pre-menopause	90	70	2+	1.98	2.98	188	282.949
Non-invasion	45	mastectomy	SLNB	Left	Pre-menopause	50	80	1+	1.48	2.49	168	282.649
Non-invasion	47	mastectomy	SLNB	Right	Pre-menopause	80	90	2+	3.39	1.56	150	69.0265
Non-invasion	48	mastectomy	ALND	Right	Pre-menopause	80	0	1+	2.38	2.05	236	203.277
Non-invasion	49	mastectomy	ALND	Right	Pre-menopause	90	0	3+	2.43	3.7	192	292.346
Non-invasion	49	mastectomy	ALND	Right	Pre-menopause	0	10	0+	1.84	3.73	144	291.913
Non-invasion	49	mastectomy	ALND	Right	Pre-menopause	75	80	2+	1.69	2.58	199	303.799
Non-invasion	50	lumpectomy	ALND	Right	Pre-menopause	0	20	2+	2.22	2.02	202	183.802
Non-invasion	50	mastectomy	ALND	Left	Pre-menopause	90	0	0+	2.15	2.02	234	219.851
Non-invasion	50	mastectomy	ALND	Right	Pre-menopause	80	7	2+	3.54	4.47	255	321.992
Non-invasion	51	lumpectomy	SLNB	Right	Pre-menopause	0	0	/	2.67	3.01	211	237.869
Non-invasion	52	lumpectomy	SLNB	Left	Pre-menopause	90	0	2+	1.98	2.5	214	270.202
Non-invasion	52	mastectomy	SLNB	Left	Pre-menopause	90	75	3+	1.11	3.09	199	553.973
Non-invasion	53	lumpectomy	ALND	Left	Pre-menopause	0	0	3+	1.94	3.42	288	507.711
Non-invasion	54	mastectomy	ALND	Right	Pre-menopause	0	0	3+	1.7	5.55	254	829.235
Non-invasion	55	lumpectomy	ALND	Right	Pre-menopause	20	75	3+	1.6	3.89	244	593.225
Non-invasion	56	lumpectomy	ALND	Right	Pre-menopause	0	0	3+	0.99	6.04	266	1622.87
Non-invasion	57	mastectomy	ALND	Right	Pre-menopause	90	0	3+	0.97	2.06	233	494.825
Non-invasion	58	lumpectomy	SLNB	Left	Pre-menopause	0	10	2+	1.55	4.07	277	727.348
Non-invasion	59	mastectomy	SLNB	Left	Pre-menopause	80	80	0+	1.64	3.37	343	704.823
Non-invasion	60	lumpectomy	SLNB	Left	Menopause	5	70	3+	2.57	2.33	354	320.942
Non-invasion	62	lumpectomy	SLNB	Right	Menopause	0	10	3+	1.85	5.36	234	677.968
Invasion	64	lumpectomy	SLNB	Right	Menopause	0	15	2+	1.66	3.32	299	598
Non-invasion	65	mastectomy	ALND	Right	Menopause	0	1	0+	1.25	2.7	233	503.28
Non-invasion	66	lumpectomy	SLNB	Right	Menopause	90	75	1+	1.33	5.32	221	884
Non-invasion	68	mastectomy	SLNB	Left	Menopause	90	90	3+	1.95	3.33	254	433.754
Non-Invasion	29	mastectomy	ALND	Left	Pre-menopause	0	0	1+	1.67	2.29	277	379.838
Invasion	29	mastectomy	SLNB	Right	Pre-menopause	95	0	2+	1.88	4.57	332	807.043
Invasion	33	lumpectomy	ALND	Right	Menopause	0	0	3+	2.63	3.93	306	457.255
Invasion	37	mastectomy	ALND	Left	Menopause	20	50	0+	1.06	3.59	269	911.047
Invasion	37	mastectomy	ALND	Left	Pre-menopause	50	0	0+	1.45	2.16	316	470.731
Invasion	39	lumpectomy	ALND	Left	Menopause	100	0	3+	3.11	6.93	382	851.209
Invasion	39	mastectomy	ALND	Left	Menopause	0	0	1+	2.19	3.62	392	647.963
Invasion	40	mastectomy	SLNB	Left	Menopause	90	80	3+	1.71	2.31	331	447.14
Invasion	40	mastectomy	ALND	Right	Menopause	0	0	1+	2.3	4.11	285	509.283
Invasion	41	lumpectomy	ALND	Left	Menopause	0	5	2+	1.97	3.35	281	477.843
Invasion	41	mastectomy	ALND	Right	Menopause	5	15	3+	1.95	2.4	183	225.231
Non-invasion	42	lumpectomy	ALND	Left	Menopause	90	0	3+	2.33	3.36	215	310.043
Invasion	42	mastectomy	ALND	Right	Pre-menopause	70	0	2+	1.64	2.5	210	320.122
Non-invasion	43	lumpectomy	ALND	Right	Pre-menopause	90	20	0+	1.51	2.48	196	321.907
Invasion	43	mastectomy	ALND	Left	Menopause	0	0	0+	2.45	3.32	389	527.135
Non-invasion	45	lumpectomy	ALND	Right	Menopause	50	90	2+	2.25	2.47	190	208.578
Non-invasion	45	mastectomy	ALND	Left	Menopause	0	0	0+	2.27	2.41	233	247.37
Invasion	46	mastectomy	ALND	Right	Menopause	5	0	2+	1.91	3.59	184	345.843
Invasion	46	mastectomy	SLNB	Right	Menopause	0	15	2+	1.36	3.84	166	468.706
Invasion	47	mastectomy	ALND	Left	Pre-menopause	95	90	2+	1.64	4.81	253	742.03
Invasion	48	mastectomy	ALND	Left	Pre-menopause	90	95	3+	1.6	2.23	299	416.731
Invasion	49	mastectomy	ALND	Right	Pre-menopause	0	10	3+	2.33	3.79	186	302.549
Invasion	50	mastectomy	ALND	Right	Pre-menopause	0	5	2+	2.34	6.59	320	901.197
Invasion	52	mastectomy	ALND	Right	Pre-menopause	60	10	1+	2.88	6.35	228	502.708
Invasion	54	mastectomy	SLNB	Left	Pre-menopause	80	90	0+	2.69	3.22	193	231.026
Invasion	56	lumpectomy	ALND	Right	Pre-menopause	70	70	2+	2.33	1.91	299	245.103
Invasion	57	mastectomy	SLNB	Right	Pre-menopause	0	20	3+	1.66	3.13	233	439.331
Invasion	59	mastectomy	SLNB	Right	Pre-menopause	90	0	3+	1.3252	7.84	262	1550.02
Invasion	60	mastectomy	ALND	Right	Menopause	80	100	2+	1.85	2.37	391	500.903
Invasion	61	mastectomy	SLNB	Left	Menopause	100	0	2+	1.99	4.26	211	451.688
Non-invasion	63	mastectomy	SLNB	Left	Menopause	90	20	3+	2.39	3.29	235	323.494
Invasion	65	mastectomy	ALND	Left	Menopause	20	0	2+	1.66	3.42	233	480.036
Invasion	66	lumpectomy	SLNB	Right	Menopause	90	50	1+	1.99	5.14	211	544.995
Invasion	70	mastectomy	ALND	Right	Menopause	95	0	2+	2.11	3.5	261	432.938
Invasion	84	mastectomy	ALND	Left	Menopause	70	90	0+	2.33	3.5	266	399.571
